# Supplementary material for: Yield stability analysis reveals sources of large-scale nitrogen loss from the US Midwest
Source: PubMed Central journal article supplement (PMC6453884; doi:10.1038/s41598-019-42271-1), 2019-04-08

## **Yield stability analysis reveals sources of large-scale nitrogen loss from the US Midwest**

Bruno Basso<sup>1,2,3\*</sup>, Guanyuan Shuai<sup>1</sup>, Jinshui Zhang<sup>4,1</sup> and G. Philip Robertson<sup>2,3,5</sup>

<sup>1</sup>Dept. Earth and Environmental Sciences, Michigan State University, East Lansing, MI 48824, USA.

<sup>2</sup>W.K. Kellogg Biological Station, Michigan State University, Hickory Corners, MI 49060, USA.

<sup>3</sup>Great Lakes Bioenergy Research Center, Michigan State University, East Lansing MI 48824 USA.

<sup>4</sup>State Key Laboratory of Earth Surface Processes and Resource Ecology, Beijing Normal University, Beijing 100875, China.

<sup>5</sup>Dept. Plant, Soil and Microbial Sciences, Michigan State University, East Lansing, MI 48824, USA.

\*E-mail: [basso@msu.edu](mailto:basso@msu.edu)

### Supplementary Information

**Table S1.** Average state-level N fertilizer rates and Coefficient of Variations (CV, %) as reported by ARMS (NASS 2016) and University-recommended rates based on statewide Maximum Return to Nitrogen (MRTN) databases (Sawyer et al. 2006). All values are kg N ha<sup>-1</sup> y<sup>-1</sup>.

| State | ARMS $\pm$ CV (%) | MRTN |
|-------|-------------------|------|
| IL    | 183 $\pm$ 2%      | 191  |
| IN    | 175 $\pm$ 4%      | 209  |
| IA    | 158 $\pm$ 4%      | 173  |
| MI    | 151 $\pm$ 5%      | 165  |
| MN    | 160 $\pm$ 4%      | 177  |
| MO    | 197 $\pm$ 4%      | 217  |
| ND    | 143 $\pm$ 4%      | 158  |
| OH    | 174 $\pm$ 11%     | 195  |
| SD    | 138 $\pm$ 3%      | 152  |
| WI    | 117 $\pm$ 5%      | 129  |

\*[https://www.nass.usda.gov/Quick\\_Stats](https://www.nass.usda.gov/Quick_Stats). (2016)



**Table S2. Average N fertilizer surplus and percent contribution from each yield stability classes.**

| State   | Average Fertilizer N Rate | Average Surplus N |            |          | Average Contribution to Surplus N |            |          |
|---------|---------------------------|-------------------|------------|----------|-----------------------------------|------------|----------|
|         |                           | Stable High       | Stable Low | Unstable | Stable High                       | Stable Low | Unstable |
| IL      | 204                       | 59                | 96         | 73       | 26                                | 42         | 32       |
| IN      | 210                       | 75                | 111        | 88       | 27                                | 41         | 32       |
| IA      | 180                       | 32                | 65         | 42       | 23                                | 47         | 30       |
| MI      | 171                       | 40                | 76         | 53       | 24                                | 45         | 31       |
| MN      | 183                       | 38                | 68         | 48       | 25                                | 44         | 31       |
| MO      | 225                       | 107               | 140        | 120      | 29                                | 38         | 33       |
| ND      | 164                       | 53                | 81         | 62       | 27                                | 41         | 32       |
| OH      | 195                       | 59                | 95         | 73       | 26                                | 42         | 32       |
| SD      | 158                       | 40                | 69         | 49       | 25                                | 44         | 31       |
| WI      | 133                       | 12                | 33         | 17       | 19                                | 53         | 27       |
| Total   |                           |                   |            |          |                                   |            |          |
| Average | 182                       | 52                | 83         | 63       | 25                                | 44         | 31       |

Values are for corn in stable high yield, stable low yield, and unstable yield areas by US state. All values are kg N ha<sup>-1</sup> y<sup>-1</sup> except percentage (%) of average surplus N contributed from each area.

**Figure S1.** Estimated yield using NDVI-stability class approach vs yield monitor data (right-hand bars).

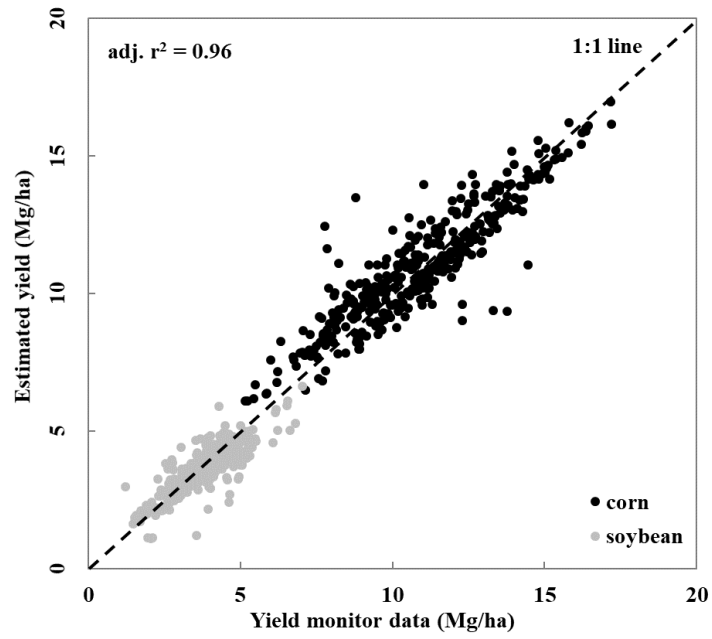

**Figure S2.** The acreage percentages of stable high yield, stable low yield, and unstable yield areas of Iowa calculated from yield monitor combine harvesters (left-hand bars) or NDVI data (right-hand bars).

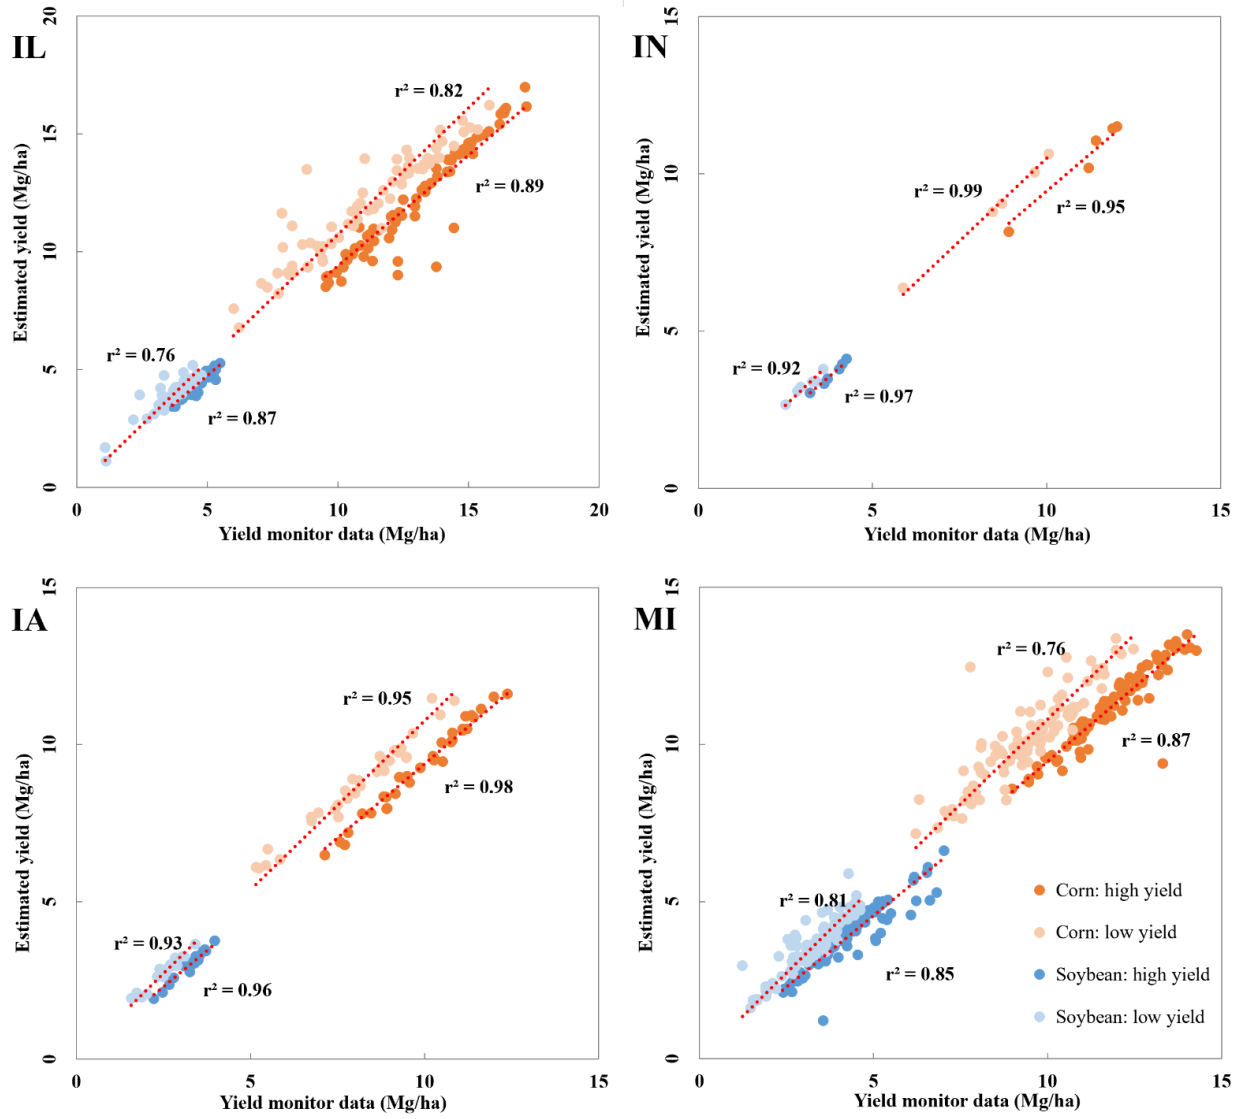

**Figure S3.** The acreage percentages of stable high yield, stable low yield, and unstable yield areas of Iowa calculated from yield monitor combine harvesters (left-hand bars) or NDVI data (right-hand bars).

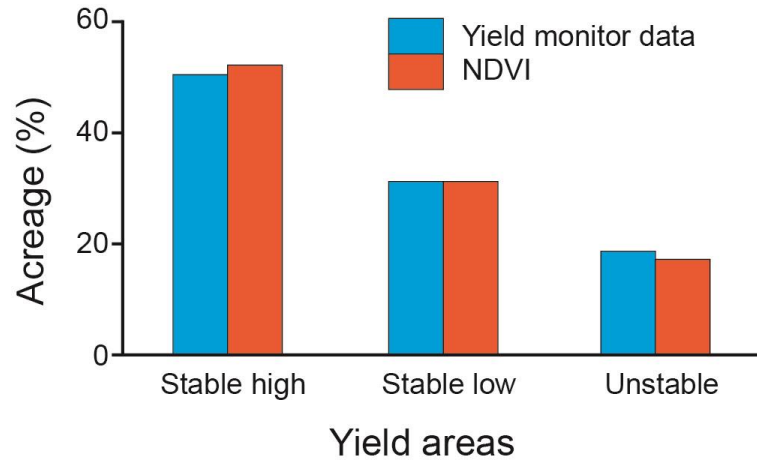

**Figure S4.** Yield stability class areas derived from combine-based yield monitor data (left-hand panels) and LANDSAT NDVI data (right-hand panels) for two representative Iowa fields (top and bottom rows). The LANDSAT NDVI spatial resolution is 30 m; yield monitor resolution is 2 m.

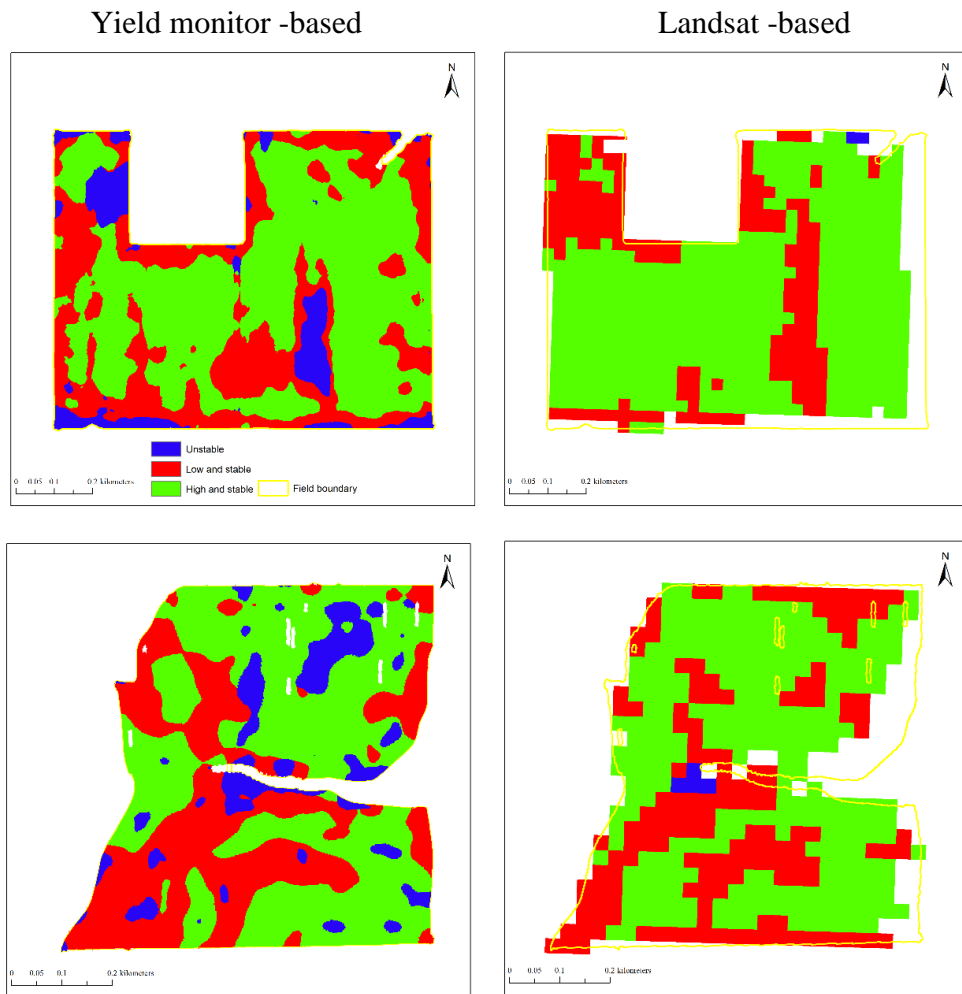



**Figure S5.** (A) County-level N loss in 2012-13 growing season and (B) mean 2013 nitrate concentration at the 100 Midwest Stream Quality Assessment sites from <sup>6</sup>. The red circles denote areas with concurrent higher N loss and nitrate concentrations. The blue rectangles are areas with lower N loss and nitrate concentration. Reproduced by permission from Peter C. Van Metre et al., 2016.

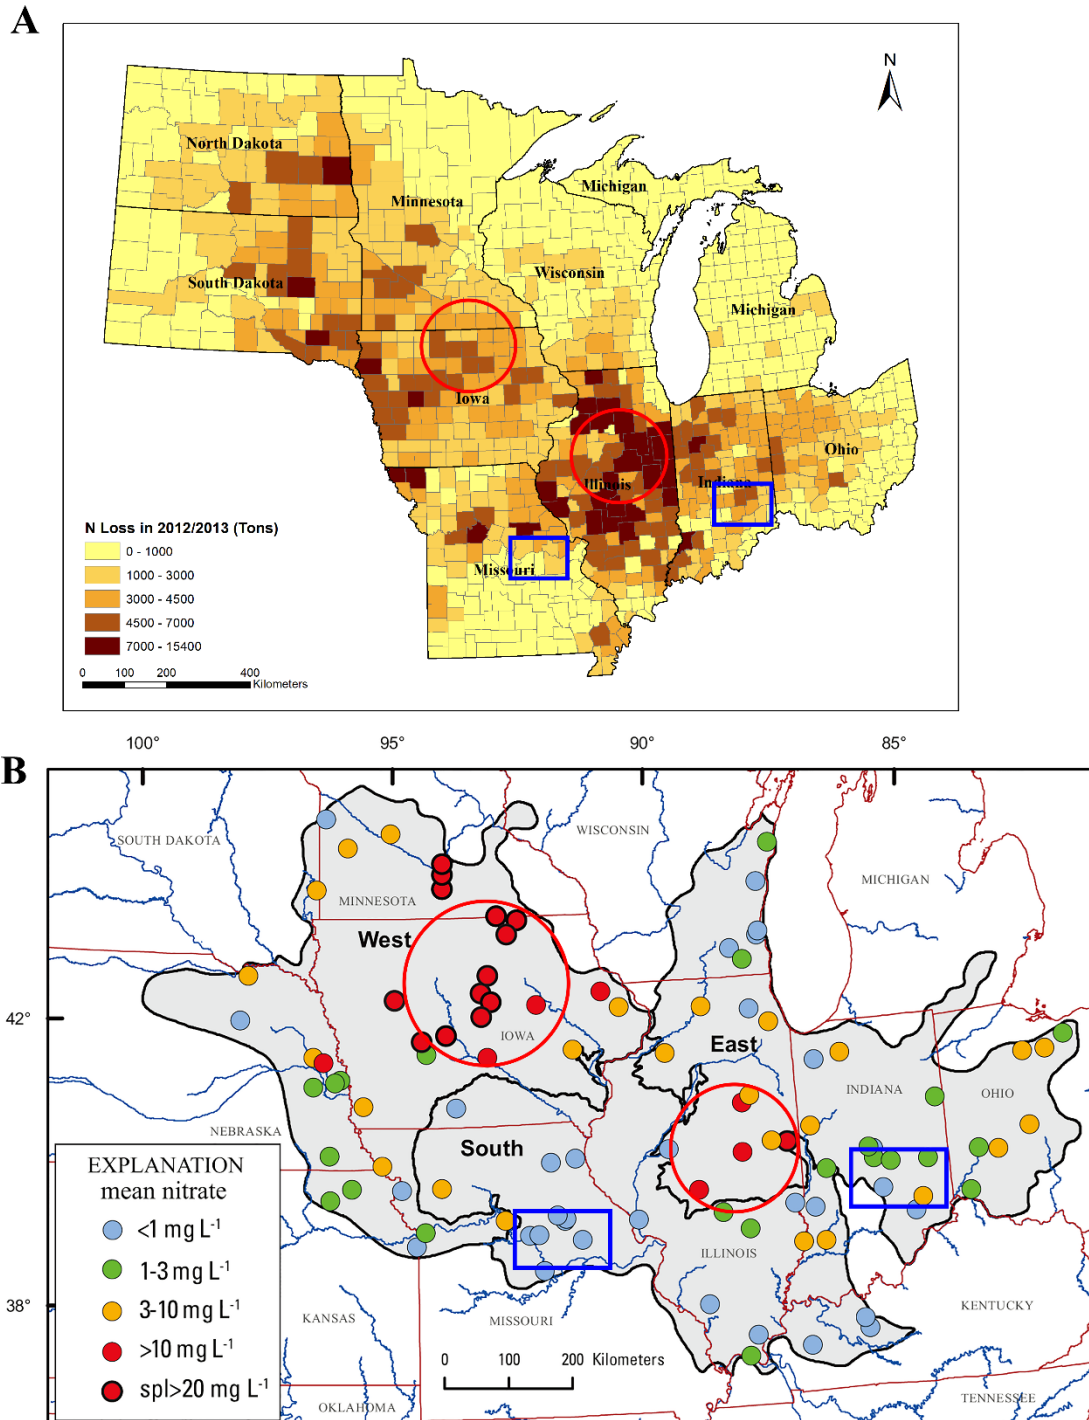

Supplement: 41598_2019_42271_MOESM1_ESM.pdf [file 41598_2019_42271_MOESM1_ESM.pdf]
